# Supplementary material for: A reference genetic map of C. clementina hort. ex Tan.; citrus evolution inferences from comparative mapping
Source: PubMed Central journal article supplement (PMC3546309; doi:10.1186/1471-2164-13-593), 2012-11-05
Supplement: 1471-2164-13-593-S5.pdf [file 1471-2164-13-593-S5.pdf]

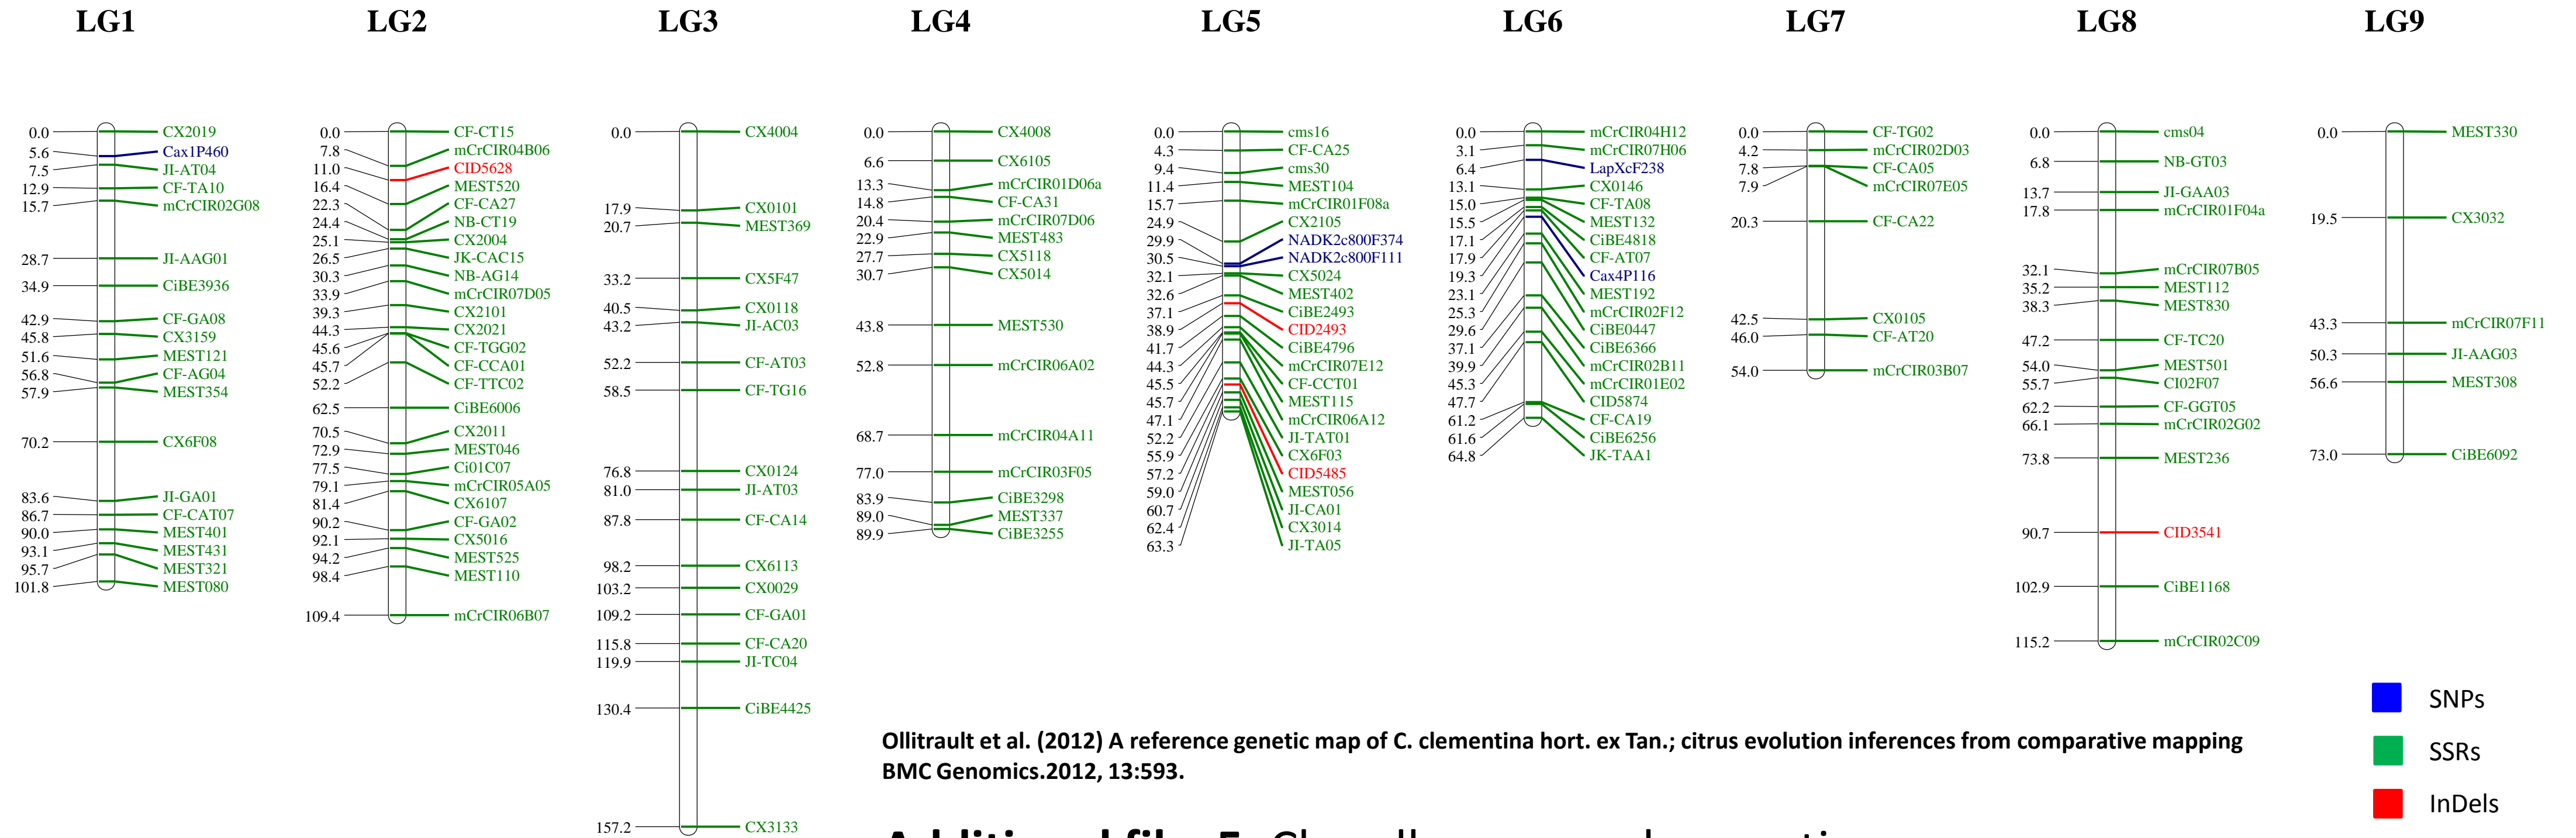

## Additional file 5: Chandler pummelo genetic map
