# Supplementary material for: A reference genetic map of C. clementina hort. ex Tan.; citrus evolution inferences from comparative mapping
Source: PubMed Central journal article supplement (PMC3546309; doi:10.1186/1471-2164-13-593), 2012-11-05
Supplement: 1471-2164-13-593-S11.pdf [file 1471-2164-13-593-S11.pdf]

**Additional file 11:** Characteristics and primers of the new SSR markers developed from genomic  
‘Cleopatra’ mandarin library at Cirad

| Marker      | GeneBank | motif               | Foward                | Reverse                | T°m |
|-------------|----------|---------------------|-----------------------|------------------------|-----|
| mCrCIR01D10 | FR692357 | (GA)9               | AAGCGACGGAAATAGAGAG   | ATGGGGATGGGTGATGAAT    | 50  |
| mCrCIR02B11 | FR692358 | (GA)11              | GTATTTGGCGTGATGAA     | CAAAGTAAATAGGGTGTGAG   | 50  |
| mCrCIR02C09 | FR692359 | (GT)3(GA)9          | TACTGACTGACCCCACC     | TCCCCGTCTCCTACC        | 50  |
| mCrCIR02D03 | FR692360 | (GA)8CA(GA)4X4(GA)8 | CAGACAACAGAAAACCAA    | GACCATTTTCCACTCAA      | 50  |
| mCrCIR02E08 | FR692361 | (TGA)4(TCA)5        | GGTTTGTGGGAGGTG       | TGATTAGCATGTTGCG       | 50  |
| mCrCIR02G08 | FR692362 | (GA)10              | CATGCAATGTTCCACTT     | AGGCAGTTGTTAGACCC      | 50  |
| mCrCIR02H05 | HE801214 | (GA)13              | GCATCATCCTACTTCTGTT   | TGGAGGACTTGTGATTG      | 50  |
| mCrCIR03E06 | FR692363 | (GT)8               | AATACACCCTTCAAATCC    | CTCCTAACAGATTTCACTACTC | 50  |
| mCrCIR03F05 | FR692364 | (GT)12              | CTAAGGAAGAGTAGAGAGCA  | TAAAATCCAAGGTTCCA      | 50  |
| mCrCIR04A02 | FR692365 | (GA)11              | GTTGTTGGTGTGGTGT      | TICTCTCTGGTGGTGG       | 50  |
| mCrCIR04A11 | FR692366 | (GT)12              | GCACTGTAACAAACAACA    | AATCCAAGGTTCCAAA       | 50  |
| mCrCIR04B06 | FR692367 | (AT)4(GT)13         | TTTTGTGTGAATGTTGG     | GGAAATATCTTACTTGTGCT   | 50  |
| mCrCIR04F01 | FR692368 | (GA)12              | TCTTGTGAATGTTAGGCA    | ACTTACGACACAAAACACAC   | 50  |
| mCrCIR04F12 | FR692369 | (GAGT)3(GT)7        | AAACAATCTTACAAGCCAC   | TGTCCTGGGTTTACTTAC     | 50  |
| mCrCIR04H09 | FR692370 | (GT)11              | GGGTCTGGATTTTGATT     | CCATTTAGTGCCCAAG       | 50  |
| mCrCIR04H12 | FR692371 | (CAT)7              | TTCCTCTACAACCTACAACCA | ATTATCCTCAACCTCCAA     | 50  |
| mCrCIR05A04 | FR692372 | (GA)8               | AAACGAGACAAGACCAAC    | TATCAAACCTCCCCTCACT    | 50  |
